# Supplementary figures and images for: Effects of enzymatic modification on the stability of cashew-based milk
Source: Royal Society of Chemistry journal article supplement (doi:10.1039/d3fo01013a), 2023-01-01

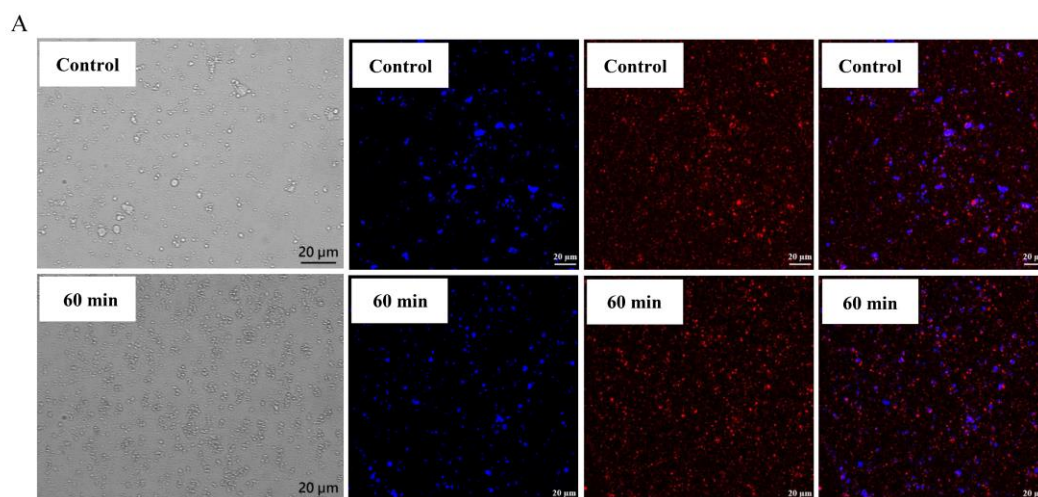

**Figure. S1. LM and CLSM images of CM taken on day 0.**

Supplement: d3fo01013a2.pdf [file d3fo01013a2.pdf]
